# Supplementary material for: 1H NMR-Based Biochemometric Analysis of Morus alba Extracts toward a Multipotent Herbal Anti-Infective
Source: PubMed Central journal article supplement (PMC9887597; doi:10.1021/acs.jnatprod.2c00481), 2022-12-21

## Supporting Information

# <sup>1</sup>H NMR-based Biochemometric Analysis of *Morus alba* Extracts towards a Multipotent Herbal Anti-infective

Julia Langeder,<sup>†,‡</sup> Kristin Döring,<sup>§</sup> Hannes Schmietendorf,<sup>§</sup> Ulrike Grienke,<sup>†</sup> Michaela Schmidtke,<sup>§,\*</sup> and Judith M. Rollinger<sup>†,\*</sup>

<sup>†</sup> Division of Pharmacognosy, Department of Pharmaceutical Sciences, University of Vienna, Josef-Holaubek-Platz 2, 1090 Vienna, Austria

<sup>‡</sup> Vienna Doctoral School of Pharmaceutical, Nutritional and Sport Sciences, University of Vienna, Josef-Holaubek-Platz 2, 1090 Vienna, Austria

<sup>§</sup> Section of Experimental Virology, Department of Medical Microbiology, Jena University Hospital, Hans-Knöll-Str. 2, 07745 Jena, Germany

**Table S1.** Results of UPLC Method Validation.

|                                     | <b>1</b>     | <b>2</b>     | <b>3*</b> | <b>4</b>     | <b>5</b>     | <b>6</b>     | <b>7</b>     |
|-------------------------------------|--------------|--------------|-----------|--------------|--------------|--------------|--------------|
| Levels used                         | 9            | 9            | n.d.      | 9            | 9            | 9            | 8            |
| Linear range (ng/mL)                | 61 – 400,000 | 60 – 393,333 | n.d.      | 59 – 384,333 | 48 – 313,333 | 68 – 446,667 | 62 – 410,000 |
| R <sup>2</sup>                      | 0.99940      | 0.99915      | n.d.      | 0.99945      | 0.99992      | 0.99994      | 0.99957      |
| LOD (ng/mL)                         | 40.7         | 6.67         | n.d.      | 36.0         | 40.0         | 102          | 14.0         |
| LOQ (ng/mL)                         | 136          | 22.2         | n.d.      | 120          | 133          | 340          | 46.7         |
| Precision as standard deviation (%) |              |              |           |              |              |              |              |
| intraday                            | 6.6          | 0.9          | 4.2       | 4.8          | 10.1         | 4.2          | 1.2          |
| interday                            | 5.5          | 2.4          | 3.0       | 8.2          | 4.4          | 3.0          | 4.7          |
| Accuracy as recovery rate (%)       |              |              |           |              |              |              |              |
| high spike                          | n.d.         | n.d.         | n.d.      | n.d.         | n.d.         | n.d.         | 95.8         |
| medium spike                        | n.d.         | n.d.         | n.d.      | n.d.         | n.d.         | n.d.         | 84.2         |
| low spike                           | n.d.         | n.d.         | n.d.      | n.d.         | n.d.         | n.d.         | 86.3         |

n.d. ... not determined

\* calculated as compound 7

**Table S2.** Parameters for Extract Optimization using Supercritical Fluid Extraction (SFE).

| Sample name           | MA organ  | Applied sample (g) | Oven temperature °C | Pressure (bar) | Flow rate (mL/min) | CO <sub>2</sub> (mL) | Ethanol (mL) <sup>a</sup> | Make up - ethanol (mL) <sup>b</sup> | Dynamic 1 (min) <sup>c</sup> | Static (min) <sup>d</sup> | Dynamic 2 (min) <sup>e</sup> | Cycles | Yield (mg) | Yield % |
|-----------------------|-----------|--------------------|---------------------|----------------|--------------------|----------------------|---------------------------|-------------------------------------|------------------------------|---------------------------|------------------------------|--------|------------|---------|
| MA01                  | root bark | 1.00               | 40                  | 300            | 10                 | 7                    | 3                         | 0                                   | 5                            | 5                         | 5                            | 1      | 34.10      | 3.4     |
| defat step #1 of MA02 | root bark | 1.02               | 40                  | 300            | 10                 | 10                   | 0                         | 2                                   | 15                           | 0                         | 0                            | 1      | 14.22      | 1.5     |
| defat step #2 of MA02 | root bark | 1.02               | 40                  | 300            | 10                 | 9                    | 1                         | 1                                   | 15                           | 0                         | 0                            | 1      | n.d.       | n.d.    |
| MA02                  | root bark | 1.02               | 40                  | 300            | 10                 | 7                    | 3                         | 0                                   | 5                            | 5                         | 5                            | 1      | 20.34      | 2.0     |
| defat step #1 of MA03 | root bark | 1.02               | 40                  | 300            | 15                 | 15                   | 0                         | 2                                   | 15                           | 0                         | 0                            | 1      | n.d.       | 0.0     |
| defat step #2 of MA03 | root bark | 1.02               | 40                  | 300            | 15                 | 13.5                 | 1.5                       | 0.5                                 | 15                           | 0                         | 0                            | 1      | 6.59       | 0.6     |
| MA03                  | root bark | 1.02               | 40                  | 300            | 15                 | 10.5                 | 4.5                       | 0                                   | 5                            | 5                         | 5                            | 1      | 7.88       | 0.8     |
| defat step of MA04    | root bark | 1.03               | 40                  | 300            | 10                 | 10                   | 0                         | 2                                   | 15                           | 0                         | 0                            | 1      | 14.34      | 1.4     |
| MA04                  | root bark | 1.03               | 40                  | 300            | 10                 | 6                    | 4                         | 0                                   | 5                            | 5                         | 5                            | 1      | 17.59      | 1.7     |
| MA05                  | root bark | 1.06               | 40                  | 300            | 10                 | 8.5                  | 1.5                       | 0.5                                 | 15                           | 0                         | 0                            | 1      | 29.63      | 2.8     |
| MA06                  | root bark | 1.06               | 40                  | 300            | 10                 | 7                    | 3                         | 0                                   | 5                            | 5                         | 5                            | 1      | 7.35       | 0.7     |
| MA07                  | root bark | 1.09               | 40                  | 300            | 10                 | 10                   | 0                         | 2                                   | 15                           | 0                         | 0                            | 1      | 17.55      | 1.6     |
| MA08                  | root bark | 1.09               | 40                  | 300            | 10                 | 7                    | 3                         | 0                                   | 5                            | 5                         | 5                            | 1      | 18.51      | 1.7     |
| defat step of MA09    | root bark | 1.04               | 40                  | 150            | 10                 | 10                   | 0                         | 2                                   | 15                           | 0                         | 0                            | 1      | 16.60      | 1.6     |
| MA09                  | root bark | 1.04               | 40                  | 150            | 10                 | 7                    | 3                         | 0                                   | 5                            | 5                         | 5                            | 1      | 15.20      | 1.5     |
| defat step of MA10    | root bark | 1.04               | 40                  | 200            | 10                 | 10                   | 0                         | 2                                   | 15                           | 0                         | 0                            | 1      | 19.28      | 1.9     |
| MA10                  | root bark | 1.04               | 40                  | 200            | 10                 | 7                    | 3                         | 0                                   | 5                            | 5                         | 5                            | 1      | 16.22      | 1.6     |
| MA11                  | root bark | 1.00               | 40                  | 300            | 10                 | 10                   | 0                         | 2                                   | 5                            | 5                         | 5                            | 1      | 25.40      | 2.5     |
| MA12                  | root bark | 1.00               | 40                  | 300            | 10                 | 7                    | 3                         | 0                                   | 5                            | 5                         | 5                            | 1      | 13.14      | 1.3     |
| MA13                  | root bark | 1.00               | 40                  | 300            | 10                 | 9.5                  | 0.5                       | 1.5                                 | 15                           | 0                         | 0                            | 1      | 25.14      | 2.5     |
| MA14                  | root bark | 1.00               | 40                  | 300            | 10                 | 7                    | 3                         | 0                                   | 5                            | 5                         | 5                            | 1      | 9.11       | 0.9     |
| MA15                  | root bark | 1.09               | 40                  | 300            | 10                 | 9                    | 1                         | 1                                   | 15                           | 0                         | 0                            | 1      | 35.14      | 3.2     |
| defat step of MA16    | root bark | 1.02               | 40                  | 300            | 10                 | 10                   | 0                         | 2                                   | 15                           | 0                         | 0                            | 1      | 16.52      | 1.6     |
| MA16                  | root bark | 1.02               | 40                  | 200            | 10                 | 5                    | 5                         | 0                                   | 5                            | 5                         | 5                            | 1      | 17.05      | 1.7     |
| defat step of MA17    | root bark | 1.01               | 40                  | 300            | 10                 | 10                   | 0                         | 2                                   | 5                            | 5                         | 5                            | 1      | 20.44      | 2.0     |
| MA17                  | root bark | 1.01               | 40                  | 200            | 10                 | 7                    | 3                         | 0                                   | 2                            | 2                         | 2                            | 3      | 16.45      | 1.6     |

| Sample name        | MA organ  | Applied sample (g) | Oven temperature °C | Pressure (bar) | Flow rate (mL/min) | CO <sub>2</sub> (mL) | Ethanol (mL) <sup>a</sup> | Make up - ethanol (mL) <sup>b</sup> | Dynamic 1 (min) <sup>c</sup> | Static (min) <sup>d</sup> | Dynamic 2 (min) <sup>c</sup> | Cycles | Yield (mg) | Yield % |
|--------------------|-----------|--------------------|---------------------|----------------|--------------------|----------------------|---------------------------|-------------------------------------|------------------------------|---------------------------|------------------------------|--------|------------|---------|
| defat step of MA18 | root bark | 1.09               | 40                  | 300            | 10                 | 10                   | 0                         | 2                                   | 5                            | 5                         | 5                            | 1      | 20.45      | 1.9     |
| MA18               | root bark | 1.09               | 40                  | 200            | 10                 | 6                    | 4                         | 0                                   | 5                            | 10                        | 5                            | 1      | 20.02      | 1.8     |
| defat step of MA19 | root bark | 1.04               | 50                  | 300            | 10                 | 10                   | 0                         | 2                                   | 15                           | 0                         | 0                            | 1      | 20.51      | 2.0     |
| MA19               | root bark | 1.04               | 50                  | 300            | 10                 | 7                    | 3                         | 0                                   | 5                            | 5                         | 5                            | 1      | 17.07      | 1.6     |
| MA20               | root bark | 1.05               |                     |                |                    |                      |                           |                                     |                              |                           |                              |        | 42.69      | 4.1     |
| MA21               | root bark | 30.0               |                     |                |                    |                      |                           |                                     |                              |                           |                              |        | 1,600.0    | 5.33    |
| MA22               | root bark | 5.5                |                     |                |                    |                      |                           |                                     |                              |                           |                              |        | 200.0      | 3.64    |
| MA23               | root bark | 4.7                |                     |                |                    |                      |                           |                                     |                              |                           |                              |        | 400.0      | 8.51    |
| MA24               | root bark | 5.48               |                     |                |                    |                      |                           |                                     |                              |                           |                              |        | 262.2      | 4.78    |
| MA25               | leaves    | 1.00               | 40                  | 300            | 10                 | 7                    | 3                         | 0                                   | 5                            | 5                         | 5                            | 1      | 45.96      | 4.6     |
| MA26               | leaves    | 1.04               | 40                  | 300            | 10                 | 10                   | 0                         | 2                                   | 15                           | 0                         | 0                            | 1      | 5.43       | 0.6     |
| MA27               | leaves    | 1.00               | 40                  | 300            | 10                 | 7                    | 3                         | 0                                   | 5                            | 5                         | 5                            | 1      | 28.52      | 2.9     |
| MA28               | leaves    | 1.03               |                     |                |                    |                      |                           |                                     |                              |                           |                              |        | 48.92      | 5.0     |
| MA29               | twigs     | 1.04               | 40                  | 300            | 10                 | 7                    | 3                         | 0                                   | 5                            | 5                         | 5                            | 1      | 29.59      | 3.1     |
| MA30               | twigs     | 1.04               | 40                  | 300            | 10                 | 10                   | 0                         | 2                                   | 15                           | 0                         | 0                            | 1      | 5.23       | 0.5     |
| MA31               | twigs     | 1.00               | 40                  | 300            | 10                 | 7                    | 3                         | 0                                   | 5                            | 5                         | 5                            | 1      | 16.62      | 1.7     |
| defat step of MA32 | twigs     | 1.03               | 40                  | 300            | 10                 | 9.5                  | 0.5                       | 1.5                                 | 15                           | 0                         | 0                            | 1      | 6.90       | 0.7     |
| MA32               | twigs     | 1.00               | 40                  | 300            | 10                 | 7                    | 3                         | 0                                   | 5                            | 5                         | 5                            | 1      | 13.76      | 1.4     |
| MA33               | twigs     | 1.00               |                     |                |                    |                      |                           |                                     |                              |                           |                              |        | 28.10      | 2.8     |
| MA34               | fruits    | 1.03               | 40                  | 300            | 10                 | 7                    | 3                         | 0                                   | 5                            | 5                         | 5                            | 1      | 215.33     | 22.2    |
| MA35               | fruits    | 1.00               | 40                  | 300            | 10                 | 10                   | 0                         | 2                                   | 15                           | 0                         | 0                            | 1      | 24.05      | 2.4     |
| MA36               | fruits    | 1.00               | 40                  | 300            | 10                 | 7                    | 3                         | 0                                   | 5                            | 5                         | 5                            | 1      | 139.02     | 13.9    |
| MA37               | fruits    | 1.00               |                     |                |                    |                      |                           |                                     |                              |                           |                              |        | 456.55     | 45.7    |

<sup>a</sup> Added amount of ethanol as co-solvent to the supercritical CO<sub>2</sub> to obtain the super-/subcritical solvent mixture (10 mL in total)

<sup>b</sup> Added amount of ethanol after passage of the backpressure regulator, when the CO<sub>2</sub> turns into a gas again to keep extractives in solution

<sup>c</sup> Extraction setting, where continuously new solvent is pumped through the sample

<sup>d</sup> Extraction setting, where the sample is soaked with solvent and no new solvent is pumped through the sample

**Table S3.** Results from the Quantitation of SFE Extracts and Traditional Extracts from *M. alba* Root Bark.

| sample | <b>1</b> [%] | ± SD [%] | <b>2</b> [%] | ± SD [%] | <b>3</b> [%] | ± SD [%] | <b>4</b> [%] | ± SD [%] | <b>5</b> [%] | ± SD [%] | <b>6</b> [%] | ± SD [%] | <b>7</b> [%] | ± SD [%] | <b>Total sanggenon content</b> [%] |
|--------|--------------|----------|--------------|----------|--------------|----------|--------------|----------|--------------|----------|--------------|----------|--------------|----------|------------------------------------|
| MA01   | 1.43         | 0.03     | 1.22         | 0.05     | <b>0.09</b>  | 0.13     | <b>0.05</b>  | -        | n.f.         | -        | <b>0.15</b>  | 0.01     | 1.19         | 0.09     | <b>4.12</b>                        |
| MA02   | 1.51         | 0.02     | 1.49         | 0.03     | n.f.         | -        | n.f.         | -        | 0.08         | 0.01     | 0.19         | -        | 1.42         | 0.04     | <b>4.66</b>                        |
| MA03   | n.d.         | -        | n.d.         | -        | n.d.         | -        | n.d.         | -        | n.d.         | -        | n.d.         | -        | n.d.         | -        | <b>n.d.</b>                        |
| MA04   | 1.70         | 0.28     | 1.91         | -        | n.f.         | -        | n.f.         | -        | 0.08         | -        | 0.18         | -        | 1.99         | 0.04     | <b>5.87</b>                        |
| MA05   | 1.03         | 0.01     | 0.80         | 0.06     | n.f.         | -        | n.f.         | -        | 0.11         | 0.01     | 0.19         | 0.05     | 1.71         | 0.09     | <b>3.85</b>                        |
| MA06   | n.d.         | -        | n.d.         | -        | n.d.         | -        | n.d.         | -        | n.d.         | -        | n.d.         | -        | n.d.         | -        | <b>n.d.</b>                        |
| MA07   | n.d.         | -        | n.d.         | -        | n.d.         | -        | n.d.         | -        | n.d.         | -        | n.d.         | -        | n.d.         | -        | <b>n.d.</b>                        |
| MA08   | 3.02         | 0.62     | 4.30         | 0.16     | <b>0.26</b>  | 0.01     | <b>0.11</b>  | 0.01     | <b>0.10</b>  | -        | <b>0.27</b>  | -        | 3.49         | 0.05     | <b>11.54</b>                       |
| MA09   | 3.61         | 0.75     | 5.17         | 0.59     | <b>0.57</b>  | 0.15     | <b>0.28</b>  | 0.04     | <b>0.16</b>  | 0.01     | <b>0.35</b>  | 0.01     | 4.24         | 0.02     | <b>14.39</b>                       |
| MA10   | 3.91         | 0.61     | 5.98         | 0.44     | <b>0.43</b>  | 0.01     | <b>0.21</b>  | 0.01     | <b>0.12</b>  | 0.01     | <b>0.30</b>  | 0.03     | 6.17         | 0.03     | <b>17.12</b>                       |
| MA11   | n.f.         | -        | n.f.         | -        | n.f.         | -        | n.f.         | -        | n.f.         | -        | n.f.         | -        | n.f.         | -        | <b>n.f.</b>                        |
| MA12   | 1.93         | 0.05     | 2.91         | 0.11     | <b>0.05</b>  | 0.01     | <b>0.07</b>  | 0.01     | <b>0.09</b>  | -        | <b>0.21</b>  | 0.02     | 3.24         | 0.02     | <b>8.51</b>                        |
| MA13   | 1.00         | -        | 1.04         | 0.03     | <b>0.15</b>  | 0.01     | n.f.         | -        | <b>0.10</b>  | -        | n.f.         | -        | 1.38         | 0.05     | <b>3.66</b>                        |
| MA14   | 2.63         | 0.22     | 3.80         | 0.10     | n.f.         | -        | <b>0.18</b>  | 0.02     | <b>0.11</b>  | -        | <b>0.26</b>  | 0.02     | 2.88         | 0.04     | <b>9.85</b>                        |
| MA15   | 1.14         | 0.02     | 1.59         | 0.06     | <b>0.05</b>  | 0.01     | <b>0.05</b>  | -        | <b>0.07</b>  | -        | <b>0.18</b>  | 0.01     | 1.49         | 0.08     | <b>4.56</b>                        |
| MA16   | 4.20         | 0.83     | 6.06         | 0.88     | <b>0.64</b>  | 0.21     | <b>0.34</b>  | 0.11     | <b>0.21</b>  | 0.07     | <b>0.33</b>  | 0.01     | 4.37         | 0.04     | <b>16.15</b>                       |
| MA17   | 4.42         | 0.83     | 7.37         | 0.89     | <b>0.83</b>  | 0.23     | <b>0.55</b>  | 0.12     | <b>0.25</b>  | 0.08     | <b>0.46</b>  | 0.01     | 6.01         | 0.08     | <b>19.89</b>                       |
| MA18   | 3.87         | 0.26     | 5.17         | 0.63     | <b>0.51</b>  | 0.21     | <b>0.38</b>  | 0.13     | <b>0.19</b>  | 0.08     | <b>0.36</b>  | 0.01     | 4.08         | 0.11     | <b>14.56</b>                       |
| MA19   | 3.22         | 0.02     | 5.78         | 0.06     | <b>0.28</b>  | 0.01     | <b>0.27</b>  | 0.02     | <b>0.15</b>  | 0.02     | <b>0.34</b>  | 0.07     | 6.69         | 0.16     | <b>16.73</b>                       |
| MA20   | 1.53         | 0.03     | 2.05         | 0.02     | n.f.         | -        | <b>0.04</b>  | 0.01     | n.f.         | -        | <b>0.18</b>  | 0.01     | 1.50         | 0.06     | <b>5.31</b>                        |
| MA21   | 0.21         | 0.01     | 1.06         | 0.01     | <b>0.05</b>  | 0.00     | <b>0.01</b>  | 0.00     | <b>0.04</b>  | 0.00     | <b>0.18</b>  | 0.00     | 1.04         | 0.01     | <b>2.59</b>                        |
| MA22   | 1.45         | 0.04     | 1.63         | 0.02     | <b>0.09</b>  | 0.00     | <b>0.47</b>  | 0.03     | <b>0.16</b>  | 0.01     | <b>0.40</b>  | 0.0      | 1.01         | 0.02     | <b>5.21</b>                        |
| MA23   | 0.68         | 0.01     | 1.67         | 0.16     | <b>0.03</b>  | 0.02     | <b>0.23</b>  | 0.04     | <b>0.31</b>  | 0.02     | <b>0.42</b>  | 0.05     | 1.13         | 0.08     | <b>4.47</b>                        |
| MA24   | n.f.         | -        | n.f.         | -        | n.f.         | -        | n.f.         | -        | n.f.         | -        | n.f.         | -        | n.f.         | -        | <b>n.f.</b>                        |

**Table S4.** Parameters for Extract Optimization using Pressurized Liquid Extration (PLE).

| Sample name        | MA organ  | Applied sample (g) | Solvent (ratio in brackets)        | Temperature °C | Method mode  | Static (min) | Cycles | Rinse % | Purge (s) | Yield (mg) | Yield % |
|--------------------|-----------|--------------------|------------------------------------|----------------|--------------|--------------|--------|---------|-----------|------------|---------|
| MA38               | root bark | 1.77               | ethanol                            | 50             | standard     | 5            | 2      | 60      | 100       | 57.28      | 3.24    |
| defat step of MA39 | root bark | 1.23               | n-hexane                           | 50             | standard     | 5            | 1      | 60      | 100       | n.d.       | n.d.    |
| MA39               | root bark | 1.23               | ethanol/water                      | 50             | standard     | 5            | 1      | 60      | 100       | 108.47     | 8.82    |
| defat step of MA40 | root bark | 1.4                | n-hexane                           | 50             | standard     | 5            | 2      | 60      | 100       | n.d.       | n.d.    |
| MA40               | root bark | 1.4                | ethanol                            | 50             | standard     | 5            | 2      | 60      | 100       | 22.76      | 1.63    |
| defat step of MA41 | root bark | 1.98               | n-hexane                           | 100            | fixed volume | 5            | n.d.   | 0       | 100       | n.d.       | n.d.    |
| MA41               | root bark | 1.98               | ethanol                            | 100            | fixed volume | 5            | n.d.   | 0       | 100       | 43.27      | 2.19    |
| defat step of MA42 | root bark | 2.11               | n-hexane                           | 100            | pressure     | 5            | n.d.   | 0       | 100       | n.d.       | n.d.    |
| MA42               | root bark | 2.11               | ethanol                            | 100            | pressure     | 5            | n.d.   | 0       | 100       | 60.63      | 2.87    |
| defat step of MA43 | root bark | 2.12               | n-hexane                           | 100            | flow         | 15           | 1      | 0       | 100       | n.d.       | n.d.    |
| MA43               | root bark | 2.12               | ethanol                            | 100            | flow         | 15           | 1      | 0       | 100       | 109.58     | 5.17    |
| defat step of MA44 | root bark | 2.35               | n-hexane                           | 100            | flow         | 5            | 1      | 0       | 100       | n.d.       | n.d.    |
| MA44               | root bark | 2.35               | acetone                            | 100            | flow         | 5            | 1      | 0       | 100       | 36.41      | 1.55    |
| defat step of MA45 | root bark | 2.47               | n-hexane                           | 100            | flow         | 15           | 1      | 0       | 100       | n.d.       | n.d.    |
| MA45               | root bark | 2.47               | ethanol                            | 100            | flow         | 5            | 1      | 0       | 100       | 92.05      | 3.73    |
| MA46               | root bark | 2.43               | dichloromethane                    | 100            | flow         | 5            | 1      | 0       | 100       | 65.79      | 2.71    |
| MA47               | root bark | 2.43               | dichloromethane(5)-<br>methanol(1) | 100            | flow         | 5            | 1      | 0       | 100       | 33.48      | 1.38    |
| MA48               | root bark | 2.43               | dichloromethane(5)-<br>methanol(2) | 100            | flow         | 5            | 1      | 0       | 100       | 19.42      | 0.80    |
| cycle #2 of MA48   | root bark | 2.43               | dichloromethane(5)-<br>methanol(3) | 100            | flow         | 5            | 1      | 0       | 100       | 13.06      | 0.54    |
| cycle #3 of MA48   | root bark | 2.43               | dichloromethane(1)-<br>methanol(1) | 100            | flow         | 5            | 1      | 0       | 100       | 13.64      | 0.56    |
| MA49               | root bark | 2.43               | methanol                           | 100            | flow         | 5            | 1      | 0       | 100       | 21.15      | 0.87    |
| defat step of MA50 | root bark | 2.24               | n-hexane                           | 100            | flow         | 5            | 1      | 0       | 100       | n.d.       | n.d.    |
| MA50               | root bark | 2.24               | isopropanol                        | 100            | flow         | 5            | 1      | 0       | 100       | 35.09      | 1.57    |
| defat step of MA51 | root bark | 2.21               | n-hexane                           | 100            | flow         | 5            | 1      | 0       | 100       | n.d.       | n.d.    |

| Sample name        | MA organ  | Applied sample (g) | Solvent (ratio in brackets)                      | Temperature °C | Method mode | Static (min) | Cycles | Rinse % | Purge (s) | Yield (mg) | Yield % |
|--------------------|-----------|--------------------|--------------------------------------------------|----------------|-------------|--------------|--------|---------|-----------|------------|---------|
| MA51               | root bark | 2.21               | acetonitrile                                     | 100            | flow        | 5            | 1      | 0       | 100       | 38.88      | 1.76    |
| MA52               | root bark | 2.44               | n-hexane                                         | 100            | flow        | 5            | 1      | 0       | 100       | 56.52      | 2.32    |
| defat step of MA53 | root bark | 2.44               | ethanol                                          | 100            | flow        | 5            | 1      | 0       | 100       | 103.47     | 4.24    |
| MA53               | root bark | 2.49               | petroleum ether                                  | 100            | flow        | 20           | 1      | 0       | 100       | 64.88      | 2.61    |
| MA54               | root bark | 2.49               | isopropanol                                      | 100            | flow        | 20           | 1      | 0       | 100       | 39.66      | 1.59    |
| defat step of MA55 | root bark | 2.51               | petroleum ether                                  | 120            | flow        | 5            | 1      | 0       | 100       | 60.46      | 2.41    |
| MA55               | root bark | 2.51               | isopropanol                                      | 120            | flow        | 5            | 1      | 0       | 100       | 37.75      | 1.50    |
| defat step of MA56 | root bark | 2.55               | petroleum ether                                  | 100            | flow        | 5            | 1      | 0       | 100       | 56.58      | 2.22    |
| MA56               | root bark | 2.55               | isopropanol                                      | 80             | flow        | 5            | 1      | 0       | 100       | 32.65      | 1.28    |
| defat step of MA57 | root bark | 2.47               | petroleum ether                                  | 100            | flow        | 5            | 1      | 0       | 100       | n.d.       | n.d.    |
| MA57               | root bark | 2.47               | petroleum ether(1)-<br>isopropanol(1)            | 100            | flow        | 5            | 1      | 0       | 100       | 25.4       | 1.03    |
| defat step of MA58 | root bark | 2.26               | petroleum ether<br>ethanol(1)-<br>isopropanol(1) | 100            | flow        | 5            | 1      | 0       | 100       | n.d.       | n.d.    |
| MA58               | root bark | 2.26               | isopropanol(1)                                   | 100            | flow        | 5            | 1      | 0       | 100       | 62.43      | 2.76    |
| defat step of MA59 | root bark | 2.44               | n-hexane                                         | 120            | flow        | 5            | 1      | 0       | 100       | n.d.       | n.d.    |
| MA59               | root bark | 2.44               | petroleum ether(1)-<br>isopropanol(1)            | 80             | flow        | 5            | 1      | 0       | 100       | 22.06      | 0.90    |
| defat step of MA60 | root bark | 2.27               | n-hexane                                         | 120            | flow        | 5            | 1      | 0       | 100       | n.d.       | n.d.    |
| MA60               | root bark | 2.27               | petroleum ether(1)-<br>isopropanol(2)            | 80             | flow        | 5            | 1      | 0       | 100       | 23.15      | 1.02    |
| defat step of MA61 | root bark | 2.36               | n-hexane                                         | 120            | flow        | 5            | 1      | 0       | 100       | n.d.       | n.d.    |
| MA61               | root bark | 2.36               | petroleum ether(2)-<br>isopropanol(1)            | 80             | flow        | 5            | 1      | 0       | 100       | 18.83      | 0.80    |
| defat step of MA62 | root bark | 2.27               | n-hexane                                         | 120            | flow        | 5            | 1      | 0       | 100       | n.d.       | n.d.    |
| MA62               | root bark | 2.27               | petroleum ether(1)-<br>isopropanol(1)            | 60             | flow        | 5            | 1      | 0       | 100       | 17.36      | 0.76    |
| defat step of MA63 | root bark | 2.39               | n-hexane                                         | 120            | flow        | 5            | 1      | 0       | 100       | n.d.       | n.d.    |
| MA63               | root bark | 2.39               | petroleum ether(1)-1-<br>propanol(1)             | 80             | flow        | 5            | 1      | 0       | 100       | 23.77      | 0.99    |

**Table S5.** Results from the Quantitation of 33 PLE Extracts from *M. alba* Root Bark.

| Sample | <b>1</b> [%] | ±SD [%] | <b>2</b> [%] | ±SD [%] | <b>3</b> [%] | ±SD [%] | <b>4</b> [%] | ±SD [%] | <b>5</b> [%] | ±SD [%] | <b>6</b> [%] | ±SD [%] | <b>7</b> [%] | ±SD [%] | <b>Total sanggenon content</b> [%] |
|--------|--------------|---------|--------------|---------|--------------|---------|--------------|---------|--------------|---------|--------------|---------|--------------|---------|------------------------------------|
| MA38   | 1.80         | 0.40    | 1.84         | 0.22    | 0.04         | 0.01    | n.f.         | -       | 0.08         | 0.01    | 0.21         | 0.01    | 1.90         | 0.06    | <b>5.87</b>                        |
| MA39   | 0.89         | 0.01    | 1.59         | 0.03    | n.f.         | -       | 0.04         | 0.01    | 0.08         | 0.01    | 0.31         | 0.01    | 1.52         | 0.02    | <b>4.45</b>                        |
| MA40   | 4.54         | 0.09    | 6.63         | 0.07    | 0.47         | 0.01    | 0.45         | 0.01    | 0.13         | -       | 0.47         | 0.02    | 4.68         | 0.05    | <b>17.37</b>                       |
| MA41   | 2.46         | 0.41    | 3.84         | 0.16    | 0.12         | -       | 0.15         | 0.02    | 0.18         | 0.01    | 0.34         | -       | 2.74         | 0.01    | <b>9.83</b>                        |
| MA42   | 2.23         | 0.03    | 4.02         | 0.05    | 0.16         | -       | 0.25         | 0.04    | 0.17         | -       | 0.35         | 0.02    | 2.87         | 0.05    | <b>10.05</b>                       |
| MA43   | 1.28         | 0.09    | 2.21         | 0.04    | n.f.         | -       | 0.07         | -       | 0.11         | -       | 0.29         | 0.02    | 1.67         | 0.08    | <b>5.63</b>                        |
| MA44   | 6.48         | 0.35    | 11.23        | 0.65    | 1.17         | 0.09    | 0.96         | 0.05    | 0.25         | 0.02    | 0.71         | 0.03    | 7.56         | 0.50    | <b>28.34</b>                       |
| MA45   | 1.53         | 0.17    | 3.19         | 0.03    | 0.04         | -       | 0.19         | 0.05    | 0.15         | 0.01    | 0.38         | 0.01    | 2.44         | 0.05    | <b>7.92</b>                        |
| MA46   | 1.27         | 0.02    | 0.28         | 0.02    | 0.13         | -       | n.f.         | -       | 0.12         | 0.02    | 0.27         | 0.02    | 1.22         | 0.04    | <b>3.29</b>                        |
| MA47   | 2.57         | 0.02    | 5.42         | 0.04    | n.f.         | -       | 0.42         | 0.01    | 0.13         | -       | 0.22         | -       | 2.80         | 0.01    | <b>11.55</b>                       |
| MA48   | n.f.         | -       | n.f.         | -       | n.f.         | -       | n.f.         | -       | n.f.         | -       | n.f.         | -       | n.f.         | -       | <b>n.f.</b>                        |
| MA49   | n.f.         | -       | n.f.         | -       | n.f.         | -       | n.f.         | -       | n.f.         | -       | n.f.         | -       | n.f.         | -       | <b>n.f.</b>                        |
| MA50   | 5.13         | 0.05    | 8.97         | 0.14    | 0.99         | 0.07    | 0.54         | 0.08    | 0.27         | 0.07    | 0.53         | 0.01    | 6.07         | 0.06    | <b>22.50</b>                       |
| MA51   | 4.19         | 0.38    | 8.12         | 0.65    | 0.77         | 0.23    | 0.62         | 0.12    | 0.27         | 0.06    | 0.62         | 0.01    | 5.89         | 0.07    | <b>20.49</b>                       |
| MA52   | n.f.         | -       | n.f.         | -       | n.f.         | -       | n.f.         | -       | n.f.         | -       | n.f.         | -       | n.f.         | -       | <b>n.f.</b>                        |
| MA53   | n.f.         | -       | n.f.         | -       | n.f.         | -       | n.f.         | -       | n.f.         | -       | n.f.         | -       | n.f.         | -       | <b>n.f.</b>                        |
| MA54   | 5.45         | 0.10    | 10.72        | 0.15    | 0.76         | 0.01    | 0.90         | 0.01    | 0.33         | -       | 0.82         | 0.01    | 8.10         | 0.04    | <b>27.08</b>                       |
| MA55   | 5.03         | 0.04    | 10.58        | 0.12    | 1.13         | 0.07    | 1.13         | 0.11    | 0.53         | 0.13    | 1.01         | 0.16    | 7.07         | 0.04    | <b>26.47</b>                       |
| MA56   | 5.92         | 0.49    | 11.48        | 0.91    | 1.17         | 0.34    | 0.85         | 0.18    | 0.28         | 0.07    | 0.73         | 0.05    | 8.24         | 0.12    | <b>28.67</b>                       |
| MA57   | 5.31         | 0.01    | 9.48         | 0.10    | 0.80         | -       | 0.66         | -       | 0.26         | 0.01    | 0.68         | 0.02    | 7.77         | 0.09    | <b>24.97</b>                       |
| MA58   | 2.70         | 0.03    | 4.56         | 0.02    | 0.21         | -       | 0.29         | 0.01    | 0.12         | 0.01    | 0.42         | 0.01    | 3.47         | 0.02    | <b>11.76</b>                       |
| MA59   | 6.72         | 0.05    | 11.62        | 0.03    | 1.56         | 0.06    | 0.99         | 0.16    | 0.34         | 0.07    | 0.70         | 0.03    | 8.72         | 0.10    | <b>30.65</b>                       |
| MA60   | 7.17         | 0.04    | 10.68        | 0.10    | 1.24         | 0.04    | 1.20         | 0.05    | 0.82         | 0.04    | 0.96         | 0.06    | 6.87         | 0.10    | <b>28.95</b>                       |
| MA61   | 6.35         | 0.35    | 11.78        | 0.67    | 1.44         | 0.33    | 1.09         | 0.13    | 0.33         | 0.05    | 0.85         | 0.05    | 9.71         | 0.05    | <b>31.54</b>                       |
| MA62   | 5.89         | 0.70    | 8.67         | 0.72    | 1.07         | 0.30    | 1.09         | 0.18    | 0.30         | 0.07    | 0.65         | -       | 7.23         | 0.04    | <b>24.88</b>                       |
| MA63   | 5.55         | 0.19    | 9.16         | 0.16    | 0.84         | 0.02    | 0.75         | 0.02    | 0.30         | 0.01    | 0.79         | 0.03    | 7.83         | 0.20    | <b>25.23</b>                       |



**Table S6.** Results from cytotoxicity studies in two lung epithelial cell lines.<sup>a</sup>

| Extract/<br>Compound | Concentration | reducing cell viability by 50% <sup>a</sup> |       |              |       | reducing NADH activity by 50% <sup>a</sup> |       |              |       |
|----------------------|---------------|---------------------------------------------|-------|--------------|-------|--------------------------------------------|-------|--------------|-------|
|                      |               | A549 cells                                  |       | Calu-3 cells |       | A549 cells                                 |       | Calu-3 cells |       |
|                      |               | Mean                                        | SD    | Mean         | SD    | Mean                                       | SD    | Mean         | SD    |
| <b>MAF</b>           | µg/ml         | 17.42                                       | 2.20  | 24.67        | 8.41  | 29.23                                      | 3.49  | 25.65        | 10.36 |
| <b>MA60</b>          | µg/ml         | 37.36                                       | 7.64  | 30.30        | 12.52 | 83.03                                      | 7.96  | 29.12        | 6.16  |
| <b>1</b>             | µM            | 48.62                                       | 8.52  | 62.79        | 32.91 | 63.22                                      | 15.76 | 66.79        | 21.46 |
| <b>2</b>             | µM            | 58.07                                       | 16.29 | 49.59        | 23.75 | 87.24                                      | 2.13  | 37.58        | 14.77 |
| <b>4</b>             | µM            | 12.51                                       | 0.30  | 19.88        | 5.18  | 21.50                                      | 3.01  | 21.06        | 6.23  |
| <b>7</b>             | µM            | 12.53                                       | 0.41  | 16.13        | 5.08  | 19.52                                      | 0.83  | 13.63        | 2.60  |

<sup>a</sup> Three independent assays were performed to determine the mean concentrations with standard deviation (SD) reducing NADH activity and cell viability by 50%, respectively.

**Table S7.** UPLC Conditions used for Separation.

| Sample   | Column                                                        | Flow Rate<br>(mL/min) | Solvent Gradients |          |           | Obtained Fraction/Compound         |
|----------|---------------------------------------------------------------|-----------------------|-------------------|----------|-----------|------------------------------------|
|          |                                                               |                       | Time (min)        | %A (DCM) | %B (MeOH) |                                    |
| MAM      | PURIFLASH COLUMN 25 SILICA HC 200G 25µg (20bar)               | 100                   | 00:00             | 100      | 0         | MAM01_01-<br>MAM01_11              |
|          |                                                               |                       | 26:54             | 90       | 10        |                                    |
|          |                                                               |                       | 01:48:00          | 60       | 40        |                                    |
|          |                                                               |                       |                   |          |           |                                    |
| MAM01_04 | GEMINI-NX C <sub>18</sub> (5 µm, 110Å, 250×10 mm) Phenomenex® | 5                     | 00:00             | 95       | 05        | Sanggenon E (6)                    |
|          |                                                               |                       | 05:00             | 57       | 43        |                                    |
|          |                                                               |                       | 20:00             | 55       | 45        |                                    |
|          |                                                               |                       | 50:00             | 54       | 46        |                                    |
|          |                                                               |                       | 55:00             | 02       | 98        |                                    |
|          |                                                               |                       | 01:00:00          | 02       | 98        |                                    |
|          |                                                               |                       |                   |          |           |                                    |
| MAM01_05 | GEMINI-NX C <sub>18</sub> (5 µm, 110Å, 250×10 mm) Phenomenex® | 5                     | 00:00             | 95       | 05        | Sanggenon C (7)<br>Sanggenon O (5) |
|          |                                                               |                       | 05:00             | 60       | 40        |                                    |
|          |                                                               |                       | 01:05:00          | 52       | 48        |                                    |
|          |                                                               |                       | 01:10:00          | 02       | 98        |                                    |
|          |                                                               |                       | 01:30:00          | 02       | 98        |                                    |
|          |                                                               |                       |                   |          |           |                                    |
| MAM01_06 | GEMINI-NX C <sub>18</sub>                                     | 5                     | 00:00             | 95       | 05        | Sanggenon D (2)                    |
|          |                                                               |                       |                   |          |           |                                    |

|         |                                                                                                                           |  |               |               |                 |                 |
|---------|---------------------------------------------------------------------------------------------------------------------------|--|---------------|---------------|-----------------|-----------------|
|         | (5 $\mu\text{m}$ , 110 $\text{\AA}$ ,<br>250 $\times$ 10 mm)<br>Phenomenex <sup>®</sup>                                   |  | 05:00         | 60            | 40              |                 |
|         |                                                                                                                           |  | 30:00         | 55            | 45              |                 |
|         |                                                                                                                           |  | 35:00         | 00            | 100             |                 |
|         |                                                                                                                           |  | 45:00         | 00            | 100             |                 |
| MAF     | GEMINI-NX 5<br>C <sub>18</sub><br>(5 $\mu\text{m}$ , 110 $\text{\AA}$ ,<br>250 $\times$ 10 mm)<br>Phenomenex <sup>®</sup> |  | Time<br>(min) | %A<br>(Water) | %B<br>(ACN<br>) | Sanggenon G (4) |
|         |                                                                                                                           |  | 00:00         | 95            | 05              |                 |
|         |                                                                                                                           |  | 05:00         | 60            | 40              |                 |
|         |                                                                                                                           |  | 01:05:00      | 52            | 48              |                 |
|         |                                                                                                                           |  | 01:10:00      | 02            | 98              |                 |
|         |                                                                                                                           |  | 01:30:00      | 02            | 98              |                 |
| MA60LS2 | GEMINI-NX 5<br>C <sub>18</sub><br>(5 $\mu\text{m}$ , 110 $\text{\AA}$ ,<br>250 $\times$ 10 mm)<br>Phenomenex <sup>®</sup> |  | Time<br>(min) | %A<br>(Water) | %B<br>(ACN<br>) | Kuwanon L (1)   |
|         |                                                                                                                           |  | 00:00         | 95            | 05              |                 |
|         |                                                                                                                           |  | 05:00         | 60            | 40              |                 |
|         |                                                                                                                           |  | 30:00         | 55            | 45              |                 |
|         |                                                                                                                           |  | 35:00         | 02            | 98              |                 |
|         |                                                                                                                           |  | 45:00         | 02            | 98              |                 |

**Table S8.** qPCR Primer Sequences.

|                       |                                    |
|-----------------------|------------------------------------|
| NP_forward            | 5'-GCA TCT GTC GGA AGA ATG AT-3'   |
| NP_reverse            | 5'-AAG CAC CAT CCT CTC TAT TG-3'   |
| GAPDH_forward         | 5'-CTC TGC TCC TCC TGT TCG AC-3'   |
| GAPDH_reverse         | 5'-CAA TAC GAC CAA ATC CGT TG-3'   |
| IP-10_forward         | 5'-CCA GAA TCG AAG GCC ATC AA-3'   |
| IP-10_reverse         | 5'-TTT CCT TGC TAA CTG CTT TC-3'   |
| IL-6_forward          | 5'-CAG CCC TGA GAA AGG AGA CATG-3' |
| IL-6_reverse          | 5'-GCA TCC ATC TTT TTC AGC CATC-3' |
| IFN- $\beta$ _forward | 5'-TCT GGC ACA ACA GGT AGT AG-3'   |
| IFN- $\beta$ _reverse | 5'-GAG AAG CAC AAC AGG AGA GC-3'   |

**Table S9.** Temperature Profile for NP-Gene Quantification.

|               |                        |           |
|---------------|------------------------|-----------|
| 95° C         | 5 min                  |           |
| 95° C         | 10 sec                 | 37 cycles |
| 55° C         | 30 sec                 |           |
| 72° C         | 120 sec                |           |
| 60° C – 95° C | Melting curve analysis |           |
| 20° C         | 10 sec                 |           |

**Table S10.** Temperature Profile for Cytokine Analysis.

|               |                        |           |
|---------------|------------------------|-----------|
| 95° C         | 5 min                  |           |
| 95° C         | 10 sec                 | 35 cycles |
| 59° C         | 30 sec                 |           |
| 72° C         | 120 sec                |           |
| 60° C – 95° C | Melting curve analysis |           |
| 20° C         | 10 sec                 |           |

**Figure S1.** NMR Pseudo-Spectrum Showing the Heterocovariance Analysis (HetCA) of  $^1\text{H}$  NMR Spectra and Influenza A Virus Inhibition Data of 26 Extracts Produced by PLE. Below,  $^1\text{H}$  NMR spectra of isolates are given between (A)  $\delta = 0$  ppm and 9 ppm, and (B) zoomed in between  $\delta = 5$  ppm and 8.5 ppm for comparative reasons.

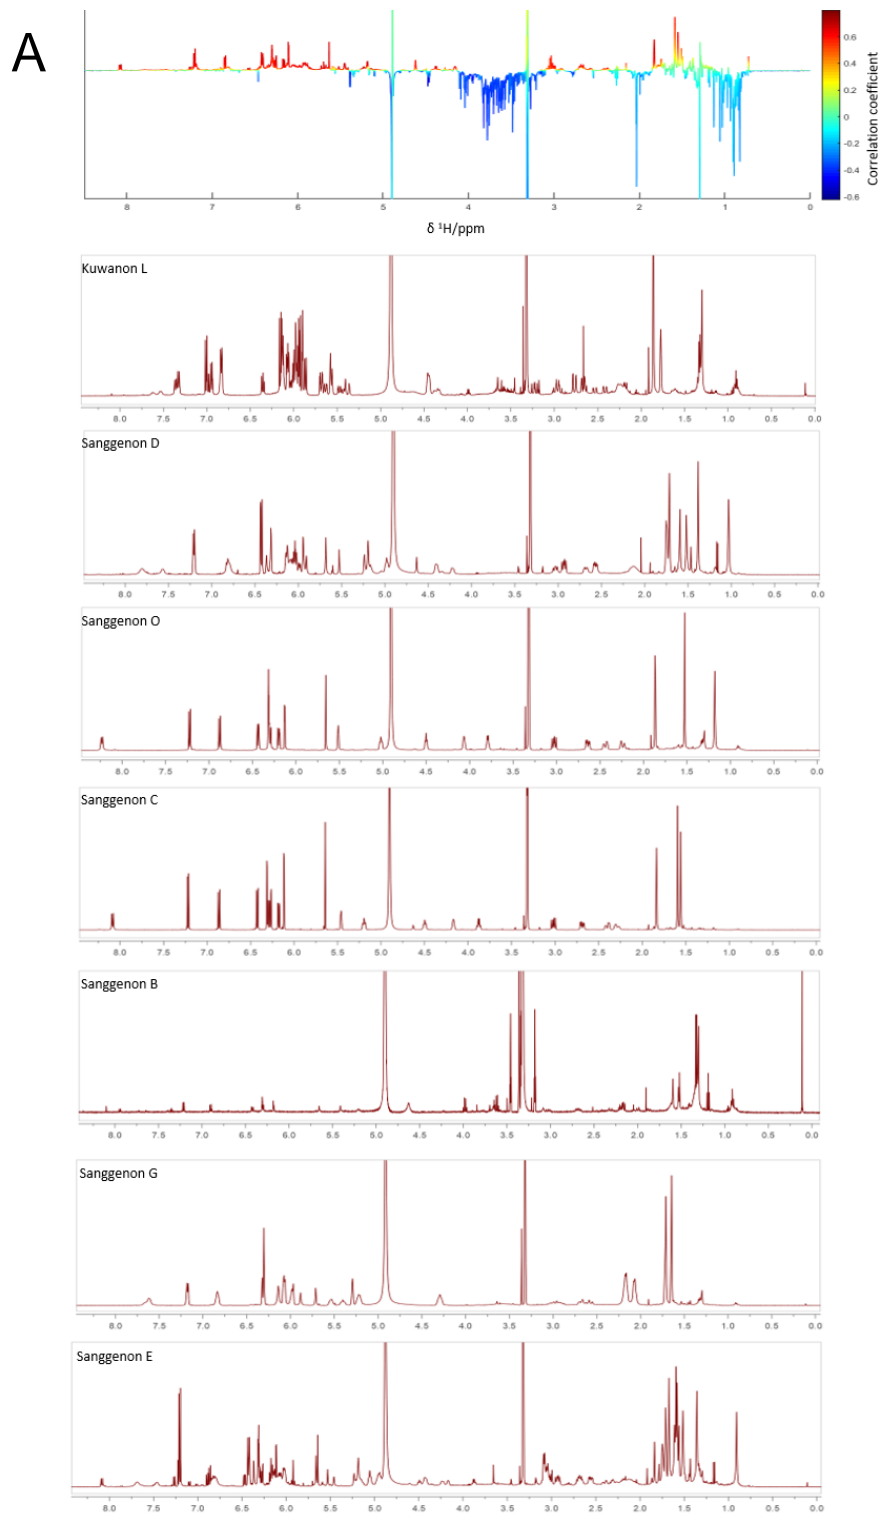

B

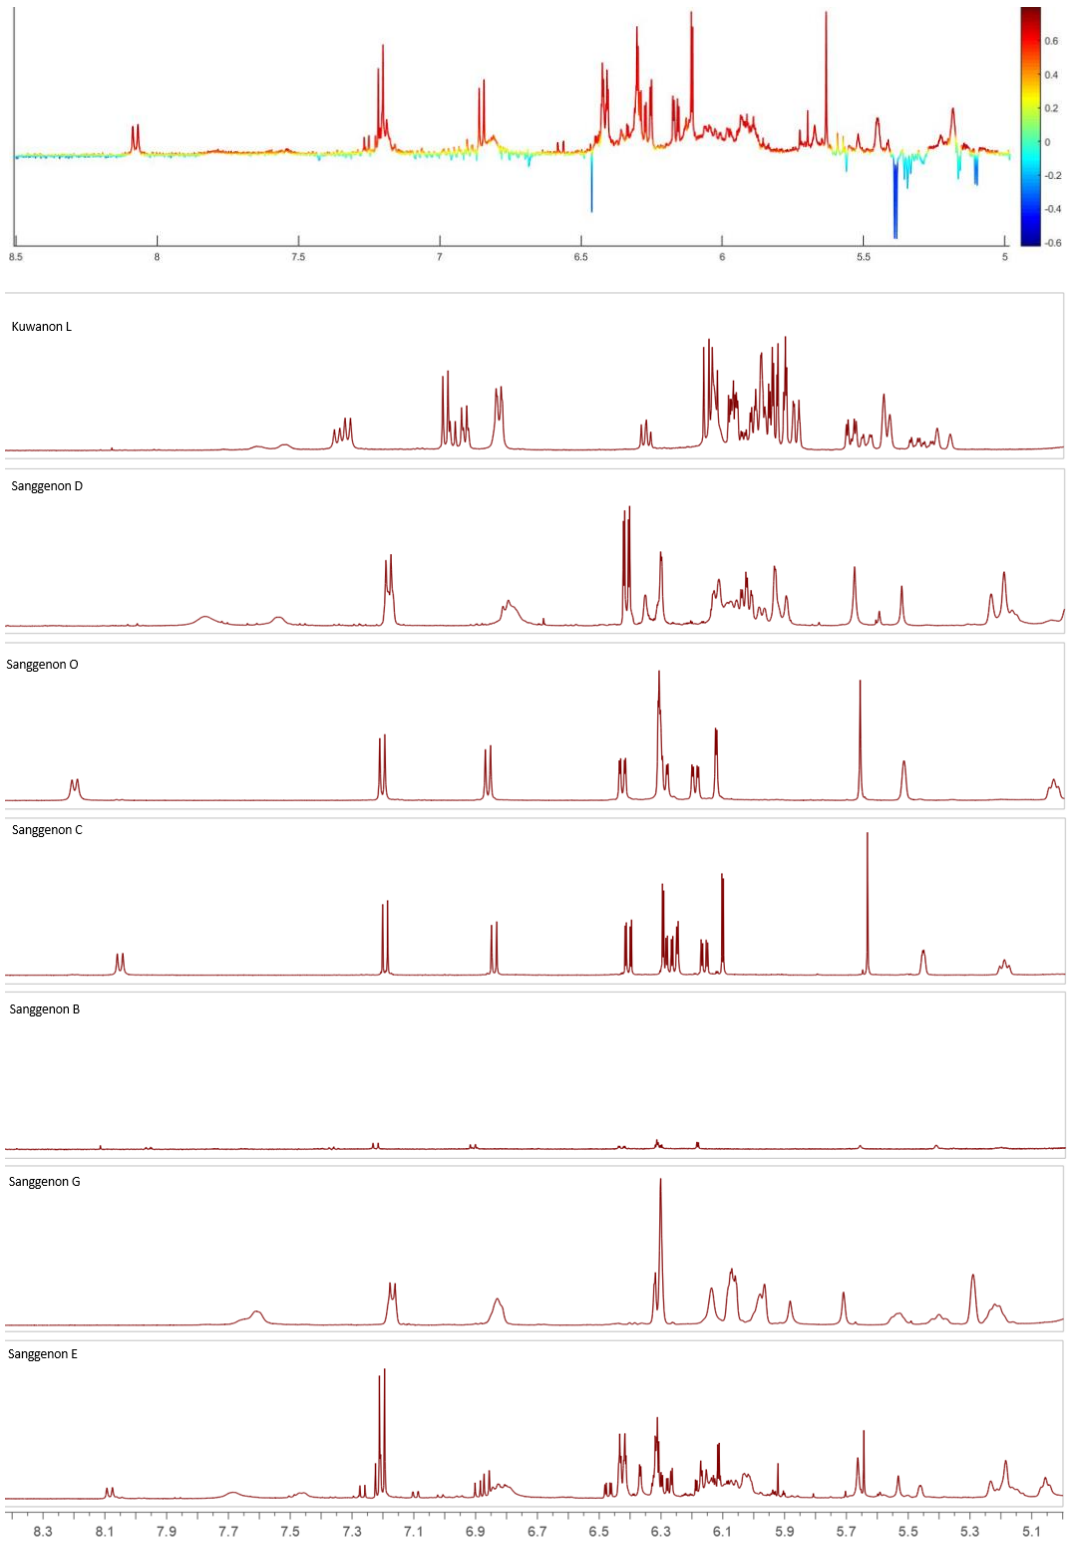

**Figure S2.** Results from studies on the effect of MA60 (10  $\mu\text{g/mL}$ ) on viral RNA synthesis (A) and virus-induced cytokine mRNA induction (B) in Calu-3 cells. \* $p < 0.05$ , \*\* $p < 0.01$  in unpaired two-sided Student's t-test.

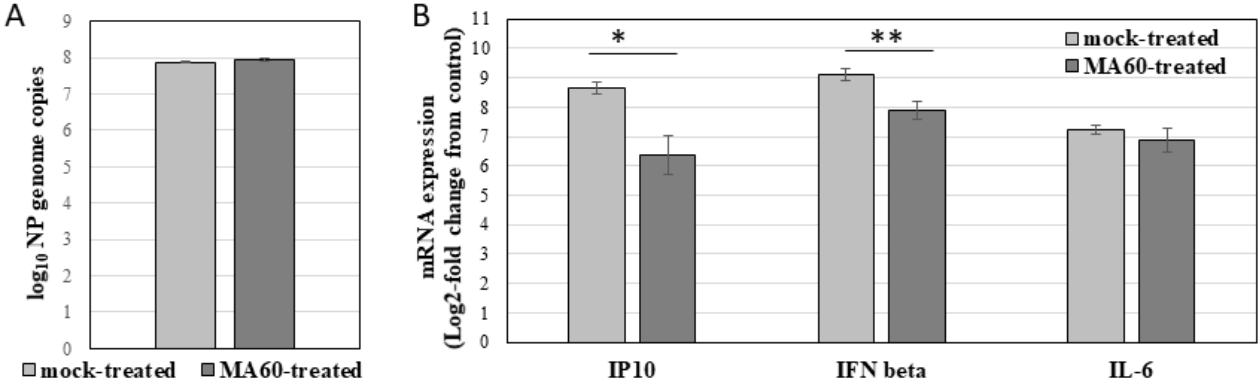

**Figure S3.** Results from studies on the effect of MA60 (A) on the influenza virus-induced hemagglutination of human erythrocytes and (B) viral neuraminidase activity.

(A) Phosphate-buffered saline (Co 1: 8178/09: -) or four hemagglutination units of influenza virus A/Jena/8178/09 (8178/09) (Co 2: 8178/09: +) were mixed with phosphate-buffered saline or with serial half-logarithmic dilutions of MAF and and MA60 (10 to 0.003  $\mu\text{g/mL}$ ). A human erythrocyte solution was added before incubating the mixture at 4  $^{\circ}\text{C}$  for 2 h. (B) After protocolling the effect on hemagglutination, we further incubated the test at 37  $^{\circ}\text{C}$  overnight allowing activation of viral neuraminidase activity. Three experiments were performed. \*The results for control and zanamivir were recently published (Döring et al. 2021)

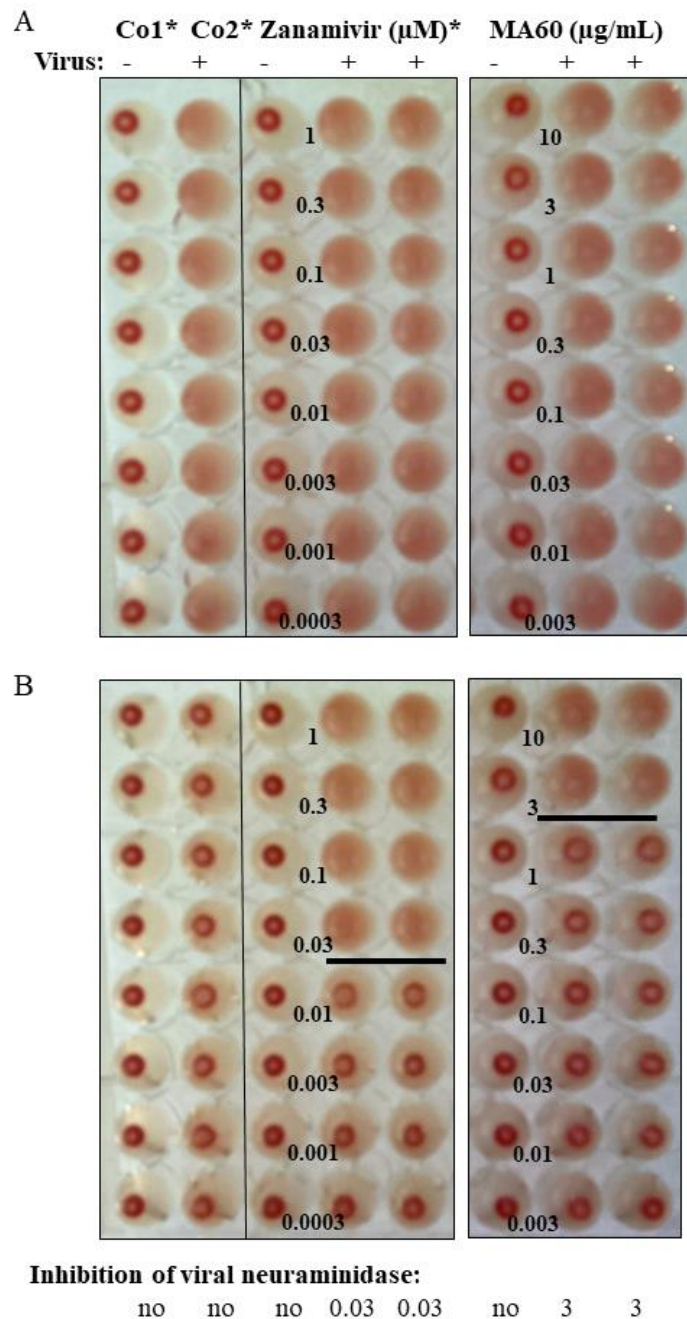

Supplement: np2c00481_si_001.pdf [file np2c00481_si_001.pdf]
